# Supplementary material for: A shape-adaptive hydrogel with dual antibacterial and osteogenic properties for alveolar bone defect repair
Source: Royal Society of Chemistry journal article supplement (doi:10.1039/d4tb02242d), 2024-12-04
Supplement: d4tb02242d1.pdf [file d4tb02242d1.pdf]

## Supplementary Information

### Shape-Adaptive Hydrogel with Dual Antibacterial and Osteogenic Properties for Alveolar Bone Defect Repair

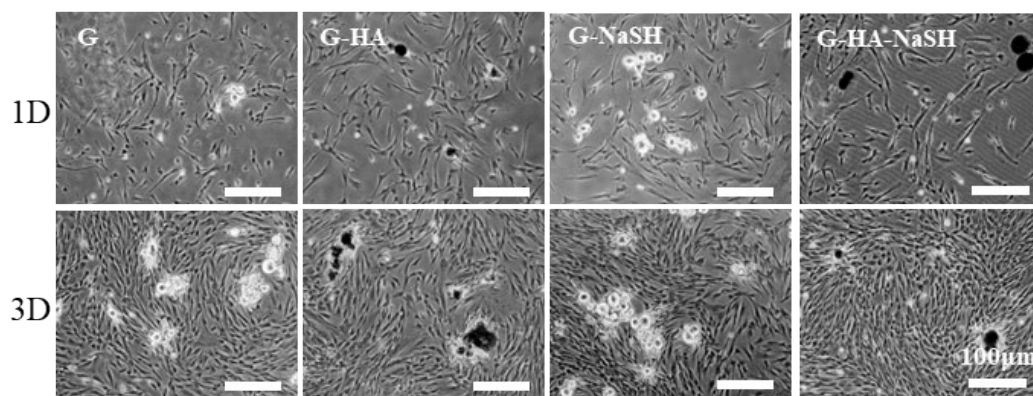

**Fig. S1.** Bright field microscopy images of cells directly co-cultured with microspheres for 1 and 3 days under an inverted microscope.

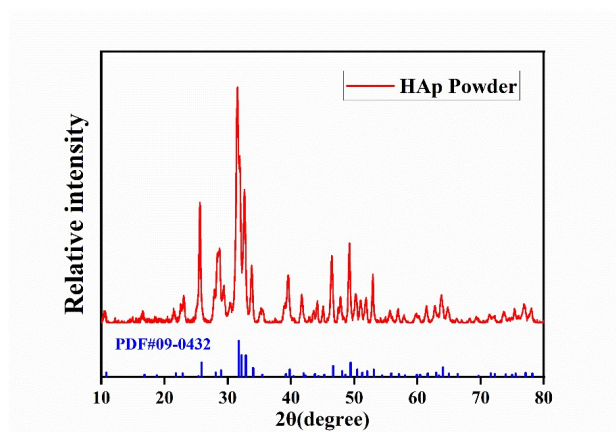

**Fig. S2.** XRD results of nano-HAP.

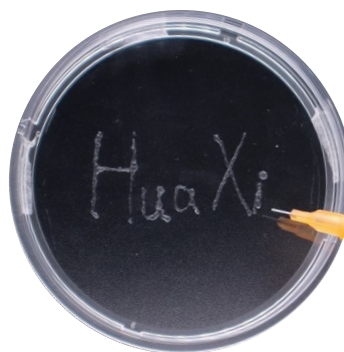

**Fig. S3.** Injectable properties of the hydrogel.

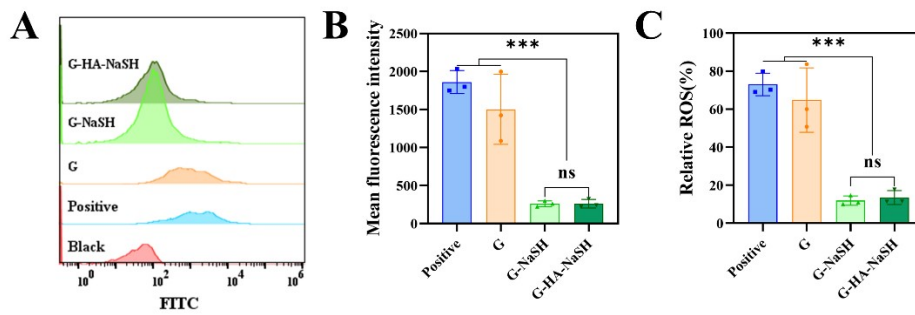

**Fig. S4.** The ability of hydrogels to clear ROS in vitro. A) The ROS content of BMSCs co-cultured with hydrogels was determined by flow cytometry. B-C) Quantitative results in Figure A. (ns:  $P > 0.05$ , \*\*\*:  $P < 0.001$ )

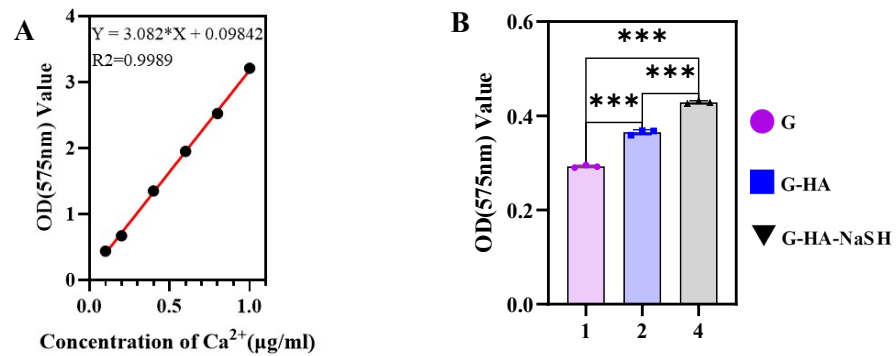

**Fig. S5.** Standard curve of the calcium ions and the absorbance results. A) Standard curve of the relationship between calcium ions of different concentrations and absorbance; B) Absorbance results. (\*\*\*:  $P < 0.001$ )

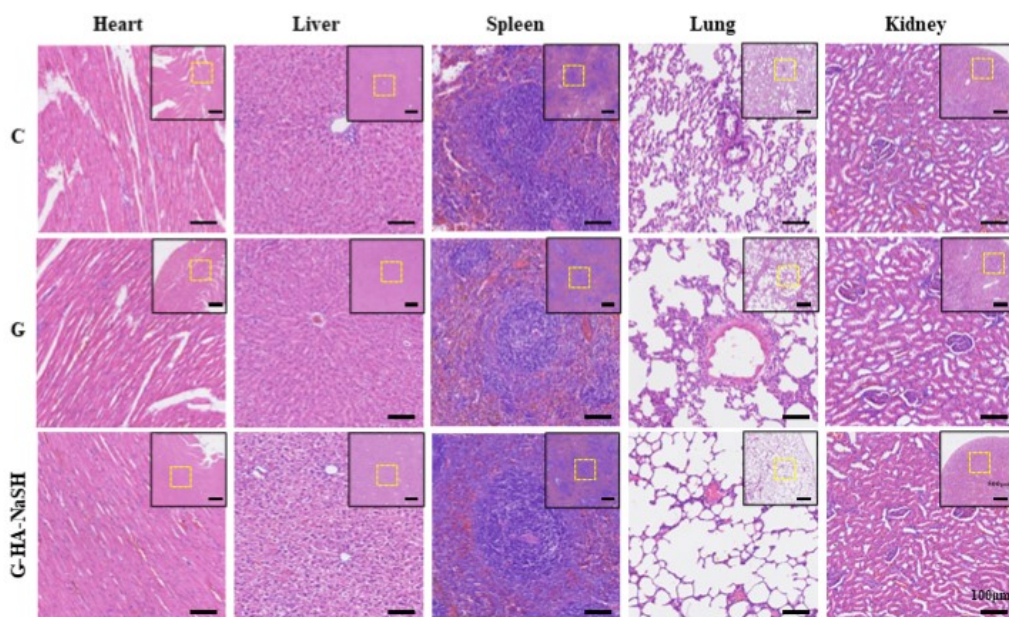

**Fig. S6.** H&E staining of the internal organs of rats implanted with the hydrogel in the bone defect area for 4 weeks.

Table S1: Sequence of bone formation related gene primers in rats

| Gene          | Primer sequence                   |
|---------------|-----------------------------------|
| <i>Gapdh</i>  | Forward: AAGTTCAACGGCACAGTCAAGG   |
|               | Reverse: GACATACTCAGCACCAGCATCAC  |
| <i>Alp</i>    | Forward: ACCTGACTGACCCTTCCCTCTC   |
|               | Reverse: CAATCCTGCCTCCTTCCACTAGC  |
| <i>Colla1</i> | Forward: TGGTCCTGCTGGCAAGAATGG    |
|               | Reverse: TCTGTCACCTTGTTTCGCCTGTC  |
| <i>Runx2</i>  | Forward: ACTTCGTCAGCGTCCTATCAGTTC |
|               | Reverse: CCATCAGCGTCAACACCATCATTC |

Table S2: Sequence of osteoclast-related gene primers in mice

| Gene         | Primer sequence                      |
|--------------|--------------------------------------|
| <i>Gapdh</i> | Forward: GCAAATTCAACGGCACAGTCAAG     |
|              | Reverse: TCGTCTCTGGAAGATGGTGATG      |
| <i>Rank</i>  | Forward: CACTGAGGAGACCACCCAAGG       |
|              | Reverse: AGCCACTACTACCACAGAGATGAAG   |
| <i>Rankl</i> | Forward: CCTCCCGCTCCATGTTCTG         |
|              | Reverse: AGTGCTGTCTTCTGATATTCTGTTAGG |
| <i>Opg</i>   | Forward: AGTGAATGCCGAGAGTGTAGAGAG    |
|              | Reverse: AGGTCAATGTCTTGGATGATCTTCTTC |
| <i>Mcsf</i>  | Forward: CCAGAAGGAGGACCAGCAAGTG      |
|              | Reverse: CCAGCAGGTGGAAGACAGACTC      |
